# Supplementary material
Source: PubMed Central journal article supplement (PMC11071703)
Supplement: 18_2022_4328_MOESM7_ESM.pdf [file 18_2022_4328_MOESM7_ESM.pdf]

**Fig. S1**

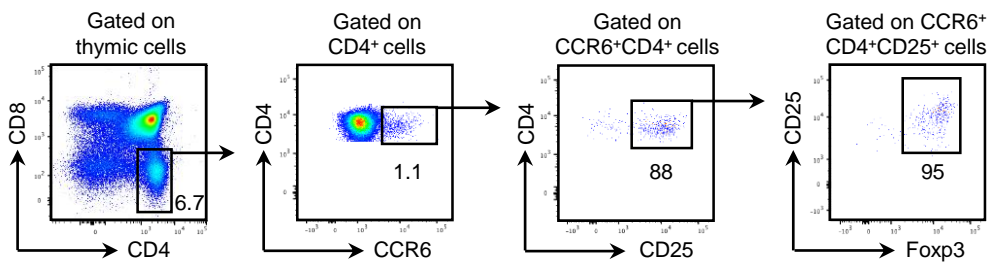

**Fig. S2**

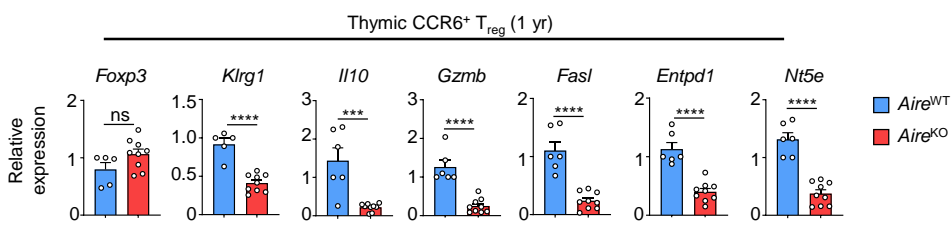

**Fig. S3**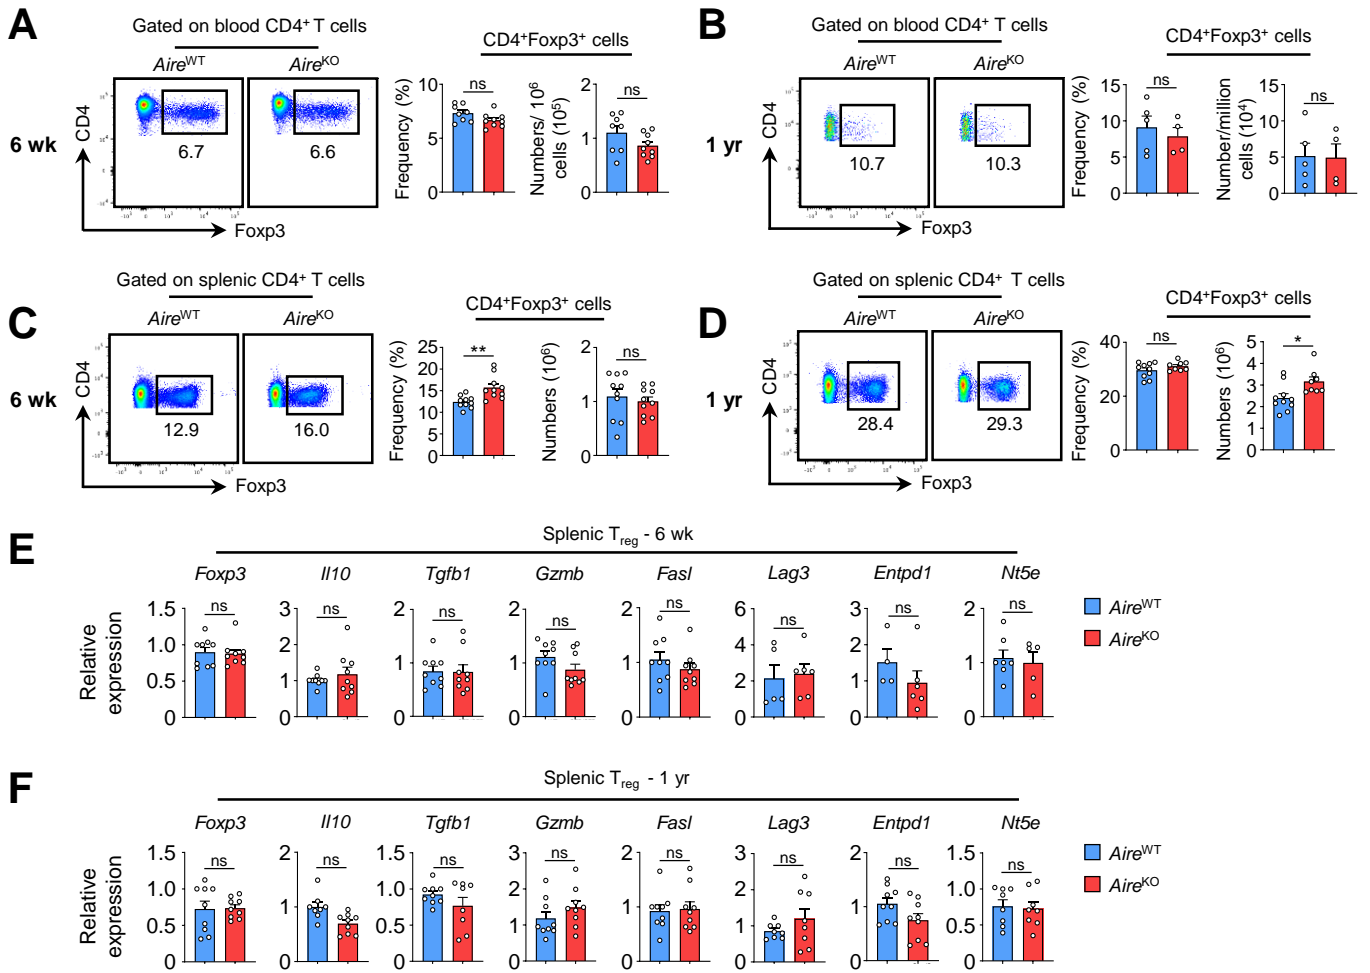

**Fig. S4**

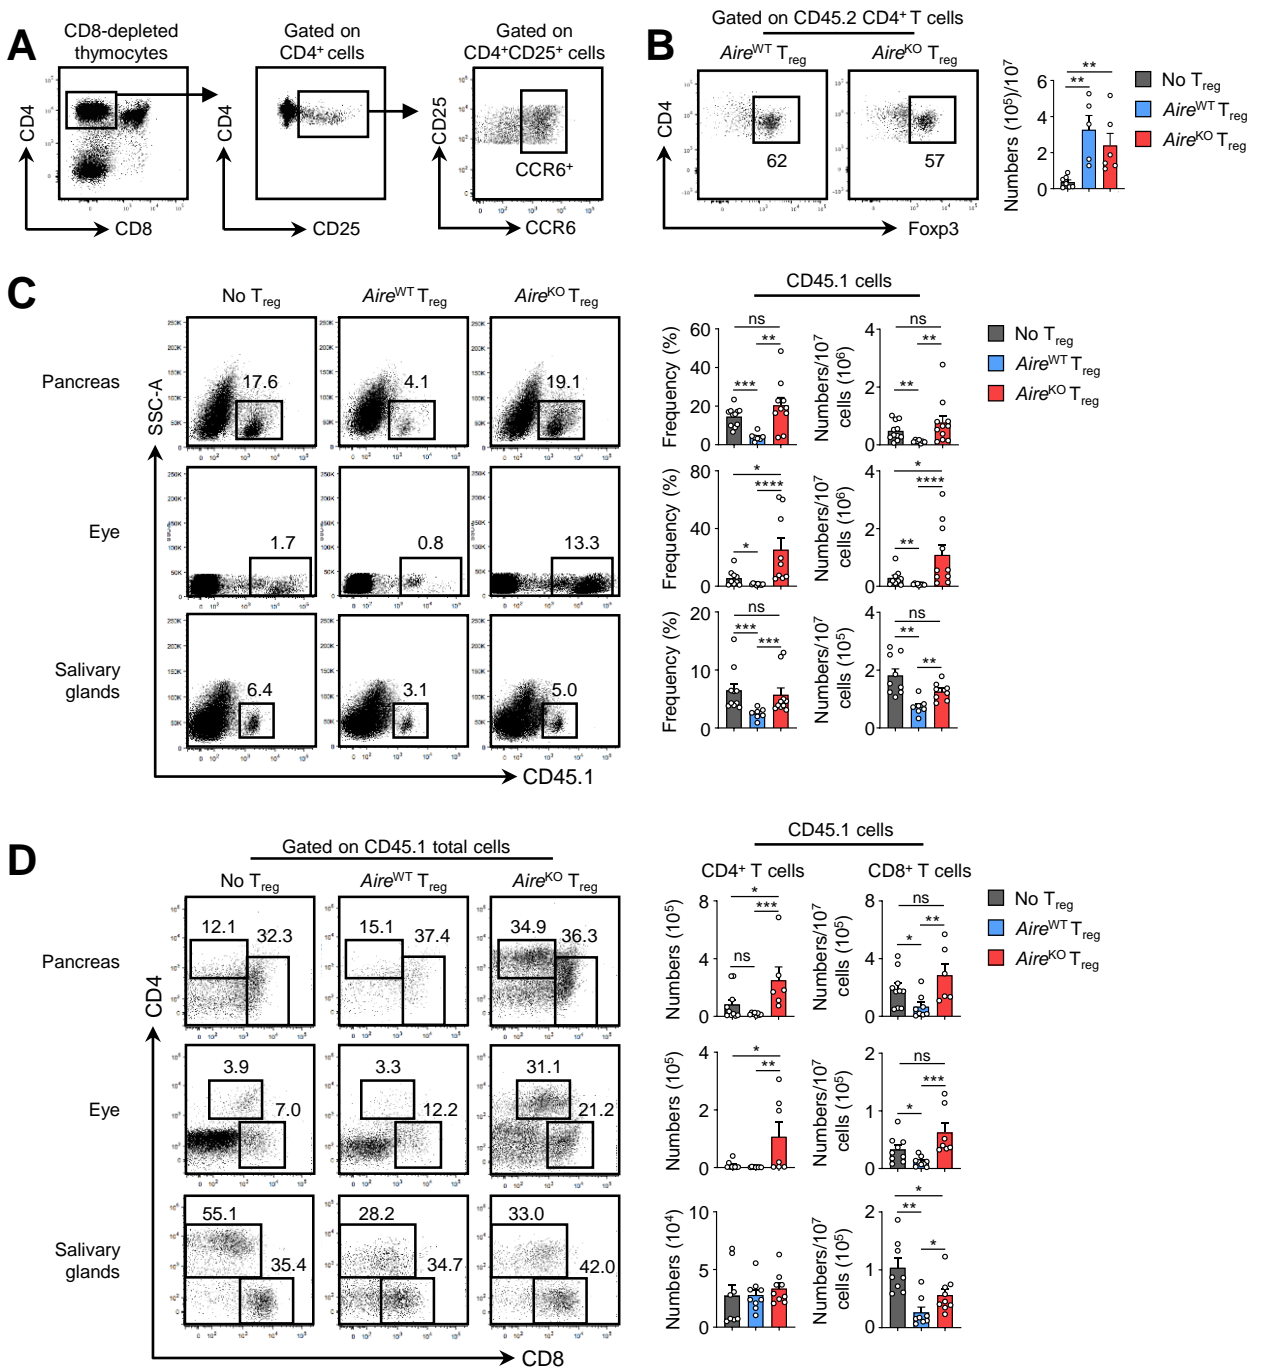

# Fig. S5

## A

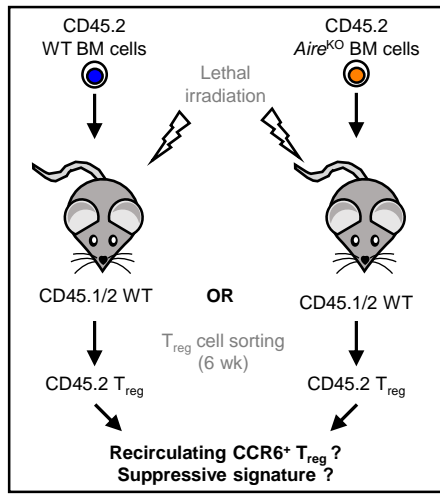

## B

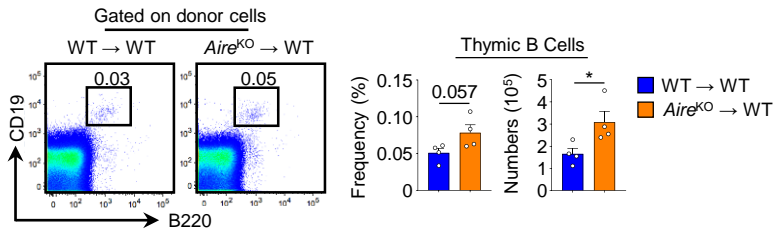

## C

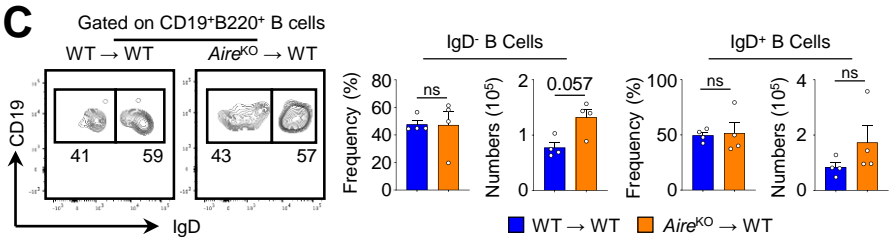

## D

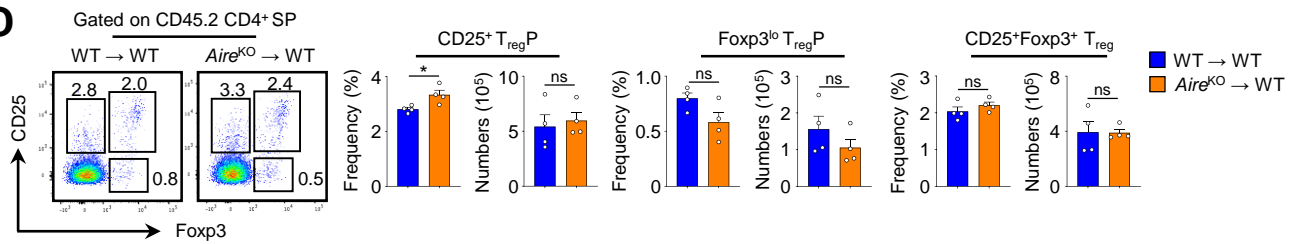

## E

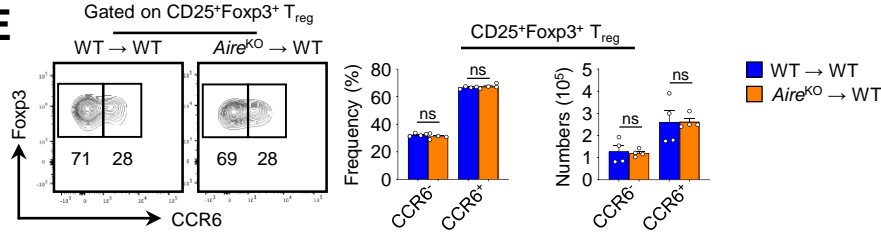

## F

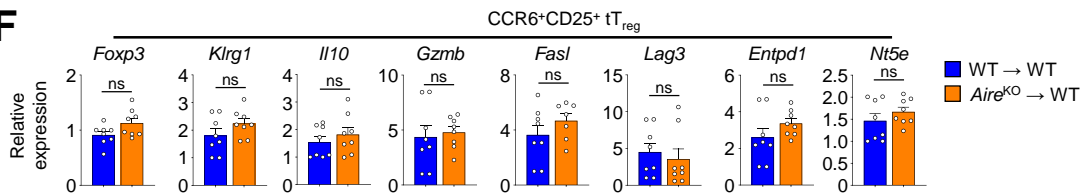

**Fig. S6**

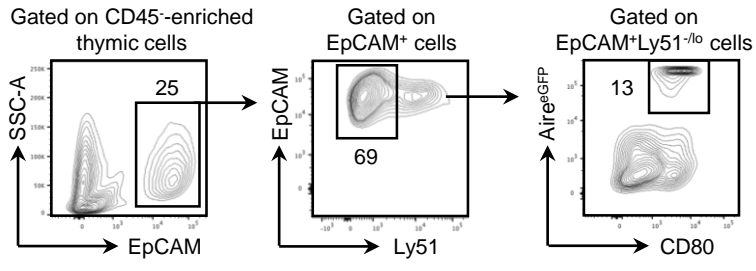

**Fig. S7**

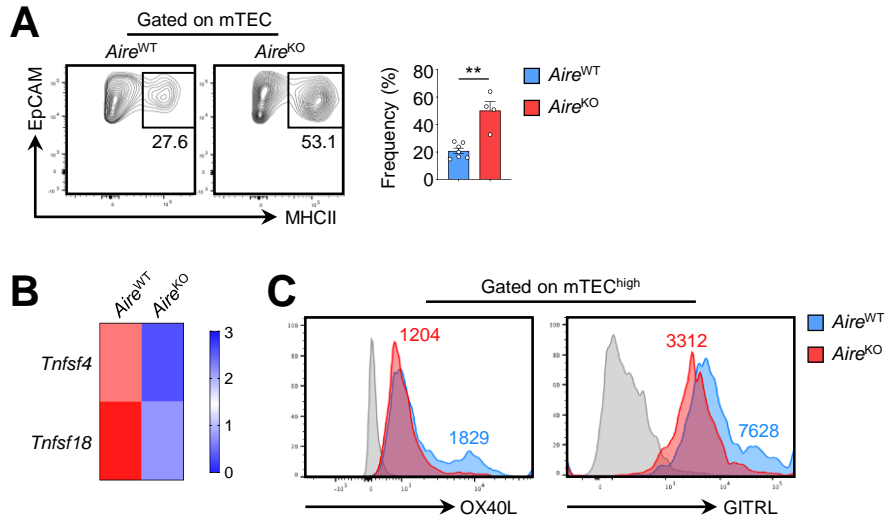

**Table S1**

| <b>Gene</b>   | <b><i>Aire</i><sup>WT</sup> mice</b> | <b><i>Aire</i><sup>KO</sup> mice</b> |
|---------------|--------------------------------------|--------------------------------------|
| <i>Il10</i>   | 3.09 ± 0.44                          | 0.31 ± 0.19                          |
| <i>Gzmb</i>   | 25.57 ± 6.90                         | 4.83 ± 1.84                          |
| <i>Fasl</i>   | 1.35 ± 0.66                          | 0.92 ± 0.15                          |
| <i>Lag3</i>   | 4.29 ± 0.53                          | 2.07 ± 0.45                          |
| <i>Entpd1</i> | 10.57 ± 0.19                         | 5.43 ± 0.38                          |
| <i>Nt5e</i>   | 69.74 ± 11.42                        | 59.41 ± 7.12                         |
| <i>Prdm1</i>  | 18.78 ± 3.56                         | 2.84 ± 0.06                          |
| <i>Klrg1</i>  | 60.16 ± 9.26                         | 12.96 ± 2.67                         |
| <i>Tigit</i>  | 77.14 ± 16.33                        | 23.54 ± 1.83                         |
| <i>Ctla4</i>  | 259.10 ± 19.43                       | 156.50 ± 2.15                        |
| <i>Lgals1</i> | 421.5 ± 20.12                        | 244.0 ± 3.59                         |
| <i>Tbx21</i>  | 5.22 ± 1.64                          | 2.2 ± 0.32                           |
| <i>Irf4</i>   | 20.71 ± 1.10                         | 13.22 ± 1.40                         |
| <i>Pparg</i>  | 2.54 ± 0.09                          | 0.87 ± 0.39                          |
| <i>Id2</i>    | 192.5 ± 25.10                        | 34.59 ± 2.99                         |
| <i>Cxcr3</i>  | 58.30 ± 14.08                        | 14.94 ± 2.71                         |
| <i>Ccr4</i>   | 35.47 ± 5.00                         | 11.08 ± 0.12                         |
| <i>Ccr8</i>   | 256.6 ± 35.04                        | 136.7 ± 3.35                         |
| <i>Ccr1</i>   | 3.67 ± 1.31                          | 0.34 ± 0.13                          |
| <i>Ccr2</i>   | 39.94 ± 2.88                         | 7.26 ± 0.64                          |



**Table S2**

| <b>Antibody</b> | <b>Clone</b> | <b>Fluorochrome</b> | <b>Supplier</b>     | <b>Dilution</b> |
|-----------------|--------------|---------------------|---------------------|-----------------|
| B220            | RA3-6B2      | PerCP               | Biolegend           | 1/200           |
| CD45.1          | A20          | BV421               | Biolegend           | 1/600           |
| CD45.1          | A20          | PerCP Cy5.5         | BD Biosciences      | 1/200           |
| CD45.2          | 104          | AF488               | Biolegend           | 1/200           |
| CD4             | RM4.5        | FITC                | BD Biosciences      | 1/200           |
| CD4             | RM4.5        | APC                 | Biolegend           | 1/200           |
| CD4             | GK1.5        | APC Cy7             | Invitrogen          | 1/200           |
| CD4             | RM4.5        | BV421               | BD Biosciences      | 1/200           |
| CD8 $\alpha$    | 53.6.7       | PeCy7               | BD Biosciences      | 1/600           |
| CD8 $\alpha$    | 53.6.7       | PB                  | BD Biosciences      | 1/200           |
| CD25            | PC61         | PerCP Cy5.5         | BD Biosciences      | 1/200           |
| CD25            | PC61         | APC                 | Biolegend           | 1/200           |
| CD25            | PC61         | PeCy7               | Biolegend           | 1/400           |
| CCR6            | 29-2L17      | PE                  | Biolegend           | 1/300           |
| CCR6            | 29-2L17      | PerCP Cy5.5         | Biolegend           | 1/200           |
| CD44            | IM7          | PerCP Cy5.5         | eBioscience         | 1/200           |
| CD19            | 1D3          | PeCy7               | BD Biosciences      | 1/300           |
| CD69            | H1.2F3       | PE                  | Biolegend           | 1/300           |
| IA/IE           | M5/114.15.2  | BV605               | BD Biosciences      | 1/1000          |
| GITRL           | YGL386       | PE                  | Biolegend           | 1/200           |
| OX40L           | RM134L       | APC                 | eBioscience         | 1/200           |
| CD80            | 16-10A1      | PerCP Cy5.5         | Biolegend           | 1/200           |
| EpCAM           | G8.8         | PeCy7               | Biolegend           | 1/3000          |
| Foxp3           | FKJ-16s      | PE                  | eBioscience         | 1/200           |
| Foxp3           | FKJ-16s      | APC                 | Invitrogen          | 1/200           |
| Foxp3           | FKJ-16s      | AF488               | Invitrogen          | 1/150           |
| IgD             | 11-26c.2a    | PE                  | BD Biosciences      | 1/300           |
| Ly51            | 6C3          | PE                  | Biolegend           | 1/3000          |
| UEA1            |              | FITC                | Vector Laboratories | 1/800           |

**Table S3**

| Primers                 | Sequence                    | Tm (°C) | Amplicon size (bp) | Accession number                                |
|-------------------------|-----------------------------|---------|--------------------|-------------------------------------------------|
| <i>Actin</i> - Forward  | CAGAAGGAGATTACTGCTCTGGCT    | 58.2    | 93                 | NM_007393.5                                     |
| <i>Actin</i> - Reverse  | GGAGCCACCGATCCACACA         | 59.9    |                    |                                                 |
| <i>Foxp3</i> - Forward  | CCCACCTACAGGCCCTTCTC        | 61.1    | 71                 | NM_001199347.1<br>NM_001199348.1<br>NM_054039.2 |
| <i>Foxp3</i> - Reverse  | GGCATGGGCATCCACAGT          | 58.4    |                    |                                                 |
| <i>Klrg1</i> - Forward  | CGAGGAATGGTAGCCACTGTTAC     | 57.3    | 163                | NM_016970                                       |
| <i>Klrg1</i> - Reverse  | CCGATCCAGTAAAAGTCCTGACC     | 57.1    |                    |                                                 |
| <i>Il10</i> – Forward   | GAATTCCCTGGGTGAGAAGC        | 55.7    | 105                | NM_010548.2                                     |
| <i>Il10</i> – Reverse   | CTCTTCACCTGCTCCACTGC        | 58.1    |                    |                                                 |
| <i>Gzmb</i> - Forward   | GAAAACAATGAAAAGCAGCTAACTACA | 56.9    | 69                 | NM_013542.3                                     |
| <i>Gzmb</i> - Reverse   | TCTAGGGACGATGGGTAATCAGA     | 56.3    |                    |                                                 |
| <i>Fasl</i> - Forward   | TCAGTCTTGCAACAACCAGC        | 55.9    | 310                | NM_001205243.1<br>NM_010177                     |
| <i>Fasl</i> - Reverse   | AGACAATATTCCTGGTGCCC        | 54.7    |                    |                                                 |
| <i>Lag3</i> - Forward   | CTGGGACTGCTTTGGGAAG         | 55.9    | 167                | NM_008479.2                                     |
| <i>Lag3</i> - Reverse   | GGTTGATGTTGCCAGATAACCC      | 56.2    |                    |                                                 |
| <i>Entpd1</i> - Forward | TACCACCCCATCTGGTCATT        | 55.7    | 168                | NM_001304721.1<br>NM_009848.4                   |
| <i>Entpd1</i> - Reverse | GGACGTTTTGTTGGTTGGT         | 56.0    |                    |                                                 |
| <i>Nt5e</i> - Forward   | CAAATCCCACACAACCACTG        | 54.3    | 158                | NM_011851.4                                     |
| <i>Nt5e</i> - Reverse   | TGCTCACTTGGTCACAGGAC        | 56.9    |                    |                                                 |
| <i>Tgfb1</i> - Forward  | CAGACATTCGGGAAGCAGTG        | 57.9    | 145                | NM_011577.2                                     |
| <i>Tgfb1</i> - Reverse  | AGCCGGTTACCAAGGTAACG        | 57.3    |                    |                                                 |
